# Supplementary material for: Repeat Interruptions Modify Age at Onset in Myotonic Dystrophy Type 1 by Stabilizing DMPK Expansions in Somatic Cells
Source: PubMed Central journal article supplement (PMC6278776; doi:10.3389/fgene.2018.00601), 2018-11-27
Supplement: Data_Sheet_1.pdf [file Data_Sheet_1.pdf]

## *Supplementary Material*

### **Repeat interruptions modify age at onset in myotonic dystrophy type 1 by stabilizing *DMPK* expansions in somatic cells**

Jovan Pešović<sup>1\*</sup>, Stojan Perić<sup>2,3</sup>, Miloš Brkušanić<sup>1</sup>, Goran Brajušković<sup>1</sup>, Vidosava Rakočević-Stojanović<sup>2,3</sup> & Dušanka Savić-Pavićević<sup>1\*</sup>

<sup>1</sup>Center for Human Molecular Genetics, Faculty of Biology, University of Belgrade, Belgrade, Serbia

<sup>2</sup>School of Medicine, University of Belgrade, Belgrade, Serbia

<sup>3</sup>Neurology Clinic, Clinical Center of Serbia, Belgrade, Serbia

Correspondence:

Prof. Dušanka Savić-Pavićević, E-mail address: duska@bio.bg.ac.rs; ORCID ID: 0000-0002-2079-4077

Jovan Pešović, E-mail address: jovan.pesovic@bio.bg.ac.rs; ORCID ID: 0000-0002-8304-2067

Center for Human Molecular Genetics, Faculty of Biology, University of Belgrade, Belgrade, Serbia

Supplementary Table 1. **Linear regression models of correlation between level of somatic instability (SI), the 10<sup>th</sup> percentile allele length (10<sup>th</sup>p) and age at sampling (AS) in DM1 patients including the reference group of 136 patients with pure *DMPK* expansions (Morales et al., 2012) and our patients observed at the first time point (six with interrupted and four with pure *DMPK* expansions) and the second time point (seven with interrupted and four with pure *DMPK* expansions).**

| Model                                                                                                                                                                                                                                                                   | Term                                                            | Coefficient          | Standard error | t-statistics | Pr(> t )      | R <sup>2</sup><br>(adjusted) | P value                       |
|-------------------------------------------------------------------------------------------------------------------------------------------------------------------------------------------------------------------------------------------------------------------------|-----------------------------------------------------------------|----------------------|----------------|--------------|---------------|------------------------------|-------------------------------|
| <b>The first time point</b>                                                                                                                                                                                                                                             |                                                                 |                      |                |              |               |                              |                               |
| Model 4*: $\log(\text{SI}) = \beta_0 + \beta_1 \log_{10}(10^{\text{th}}\text{p})$                                                                                                                                                                                       | Intercept                                                       | $\beta_0 = -1.0027$  | 0.1916         | -5.234       | $5.75e^{-07}$ | 0.69                         | <b>&lt;2.2e<sup>-16</sup></b> |
|                                                                                                                                                                                                                                                                         | $\log_{10}(10^{\text{th}}\text{p})$                             | $\beta_1 = 1.3500$   | 0.0754         | 17.905       | $<2e^{-16}$   |                              |                               |
| Model 6*: $\log(\text{SI}) = \beta_0 + \beta_1 \log_{10}(10^{\text{th}}\text{p}) + \beta_2 \log_{10}(\text{AS})$                                                                                                                                                        | Intercept                                                       | $\beta_0 = -2.16990$ | 0.24612        | -8.817       | $3.67e^{-15}$ | 0.76                         | <b>&lt;2.2e<sup>-16</sup></b> |
|                                                                                                                                                                                                                                                                         | $\log_{10}(10^{\text{th}}\text{p})$                             | $\beta_1 = 1.46048$  | 0.06857        | 21.300       | $<2e^{-16}$   |                              |                               |
|                                                                                                                                                                                                                                                                         | $\log_{10}(\text{AS})$                                          | $\beta_2 = 0.59450$  | 0.09123        | 6.517        | $1.15e^{-09}$ |                              |                               |
| Model 7*: $\log(\text{SI}) = \beta_0 + \beta_1 \log_{10}(10^{\text{th}}\text{p}) + \beta_2 \log_{10}(\text{AS}) + \beta_3 \log_{10}(10^{\text{th}}\text{p}) \times \log_{10}(\text{AS})$                                                                                | Intercept                                                       | $\beta_0 = 0.2295$   | 0.7644         | 0.300        | 0.76          | 0.77                         | <b>&lt;2.2e<sup>-16</sup></b> |
|                                                                                                                                                                                                                                                                         | $\log_{10}(10^{\text{th}}\text{p})$                             | $\beta_1 = 0.5147$   | 0.2939         | 1.751        | 0.08          |                              |                               |
|                                                                                                                                                                                                                                                                         | $\log_{10}(\text{AS})$                                          | $\beta_2 = -0.9658$  | 0.4806         | -2.010       | 0.05          |                              |                               |
|                                                                                                                                                                                                                                                                         | $\log_{10}(10^{\text{th}}\text{p}) \times \log_{10}(\text{AS})$ | $\beta_3 = 0.6181$   | 0.1871         | 3.303        | 0.001         |                              |                               |
| Model 8*: $\log(\text{SI}) = \beta_0 + \beta_1 \log_{10}(10^{\text{th}}\text{p}) + \beta_2 \log_{10}(\text{AS}) + \beta_3 \log_{10}(10^{\text{th}}\text{p}) \times \log_{10}(\text{AS}) + \beta_4 \log_{10}(10^{\text{th}}\text{p})^2 + \beta_5 \log_{10}(\text{AS})^2$ | Intercept                                                       | $\beta_0 = -9.2774$  | 0.9226         | -10.056      | $<2e^{-16}$   | 0.90                         | <b>&lt;2.2e<sup>-16</sup></b> |
|                                                                                                                                                                                                                                                                         | $\log_{10}(10^{\text{th}}\text{p})$                             | $\beta_1 = 8.7331$   | 0.6442         | 13.556       | $<2e^{-16}$   |                              |                               |
|                                                                                                                                                                                                                                                                         | $\log_{10}(\text{AS})$                                          | $\beta_2 = -1.3453$  | 0.5828         | -2.308       | 0.02          |                              |                               |
|                                                                                                                                                                                                                                                                         | $\log_{10}(10^{\text{th}}\text{p}) \times \log_{10}(\text{AS})$ | $\beta_3 = 0.3962$   | 0.1393         | 2.844        | 0.005         |                              |                               |
|                                                                                                                                                                                                                                                                         | $\log_{10}(10^{\text{th}}\text{p})^2$                           | $\beta_4 = -1.6443$  | 0.1242         | -13.237      | $<2e^{-16}$   |                              |                               |
|                                                                                                                                                                                                                                                                         | $\log_{10}(\text{AS})^2$                                        | $\beta_5 = 0.3522$   | 0.1343         | 2.622        | 0.01          |                              |                               |

Supplementary Table 1. **Continued**

| Model                                                                                                                                                                                                                                                                      | Term                                                             | Coefficient          | Standard error | t-statistics | Pr(> t )      | R <sup>2</sup><br>(adjusted) | P value                       |
|----------------------------------------------------------------------------------------------------------------------------------------------------------------------------------------------------------------------------------------------------------------------------|------------------------------------------------------------------|----------------------|----------------|--------------|---------------|------------------------------|-------------------------------|
| <b>The second time point</b>                                                                                                                                                                                                                                               |                                                                  |                      |                |              |               |                              |                               |
| Model 4*: $\log(\text{SI}) = \beta_0 + \beta_1 \log_{10}(10^{\text{th}} \text{p})$                                                                                                                                                                                         | Intercept                                                        | $\beta_0 = -1.01328$ | 0.19178        | -5.284       | $4.55e^{-07}$ | 0.69                         | <b>&lt;2.2e<sup>-16</sup></b> |
|                                                                                                                                                                                                                                                                            | $\log_{10}(10^{\text{th}} \text{p})$                             | $\beta_1 = 1.35478$  | 0.07543        | 17.961       | $<2e^{-16}$   |                              |                               |
| Model 6*: $\log(\text{SI}) = \beta_0 + \beta_1 \log_{10}(10^{\text{th}} \text{p}) + \beta_2 \log_{10}(\text{AS})$                                                                                                                                                          | Intercept                                                        | $\beta_0 = -2.21356$ | 0.24576        | -9.007       | $1.16e^{-15}$ | 0.76                         | <b>&lt;2.2e<sup>-16</sup></b> |
|                                                                                                                                                                                                                                                                            | $\log_{10}(10^{\text{th}} \text{p})$                             | $\beta_1 = 1.46867$  | 0.06826        | 21.517       | $<2e^{-16}$   |                              |                               |
|                                                                                                                                                                                                                                                                            | $\log_{10}(\text{AS})$                                           | $\beta_2 = 0.60874$  | 0.09094        | 6.694        | $4.51e^{-10}$ |                              |                               |
| Model 7*: $\log(\text{SI}) = \beta_0 + \beta_1 \log_{10}(10^{\text{th}} \text{p}) + \beta_2 \log_{10}(\text{AS}) + \beta_3 \log_{10}(10^{\text{th}} \text{p}) \times \log_{10}(\text{AS})$                                                                                 | Intercept                                                        | $\beta_0 = 0.1829$   | 0.7600         | 0.241        | 0.81          | 0.78                         | <b>&lt;2.2e<sup>-16</sup></b> |
|                                                                                                                                                                                                                                                                            | $\log_{10}(10^{\text{th}} \text{p})$                             | $\beta_1 = 0.5245$   | 0.2920         | 1.796        | 0.07          |                              |                               |
|                                                                                                                                                                                                                                                                            | $\log_{10}(\text{AS})$                                           | $\beta_2 = -0.9499$  | 0.4777         | -1.989       | 0.05          |                              |                               |
|                                                                                                                                                                                                                                                                            | $\log_{10}(10^{\text{th}} \text{p}) \times \log_{10}(\text{AS})$ | $\beta_3 = 0.6171$   | 0.1859         | 3.320        | 0.001         |                              |                               |
| Model 8*: $\log(\text{SI}) = \beta_0 + \beta_1 \log_{10}(10^{\text{th}} \text{p}) + \beta_2 \log_{10}(\text{AS}) + \beta_3 \log_{10}(10^{\text{th}} \text{p}) \times \log_{10}(\text{AS}) + \beta_4 \log_{10}(10^{\text{th}} \text{p})^2 + \beta_5 \log_{10}(\text{AS})^2$ | Intercept                                                        | $\beta_0 = -9.2521$  | 0.9103         | -10.164      | $<2e^{-16}$   | 0.90                         | <b>&lt;2.2e<sup>-16</sup></b> |
|                                                                                                                                                                                                                                                                            | $\log_{10}(10^{\text{th}} \text{p})$                             | $\beta_1 = 8.7348$   | 0.6340         | 13.776       | $<2e^{-16}$   |                              |                               |
|                                                                                                                                                                                                                                                                            | $\log_{10}(\text{AS})$                                           | $\beta_2 = -1.4005$  | 0.5725         | -2.446       | 0.02          |                              |                               |
|                                                                                                                                                                                                                                                                            | $\log_{10}(10^{\text{th}} \text{p}) \times \log_{10}(\text{AS})$ | $\beta_3 = 0.4069$   | 0.1374         | 2.962        | 0.004         |                              |                               |
|                                                                                                                                                                                                                                                                            | $\log_{10}(10^{\text{th}} \text{p})^2$                           | $\beta_4 = -1.6460$  | 0.1221         | -13.483      | $<2e^{-16}$   |                              |                               |
|                                                                                                                                                                                                                                                                            | $\log_{10}(\text{AS})^2$                                         | $\beta_5 = 0.3616$   | 0.1312         | 2.757        | 0.007         |                              |                               |

The published linear regression models explaining the variability of somatic instability (Morales et al., 2012) were retested using the 10<sup>th</sup> percentile allele length (as an estimation of the progenitor allele length (Higham, 2013)) and age at sampling as independent variables. All models were slightly improved since values of the adjusted squared coefficient of correlation (adjusted R<sup>2</sup>) were higher than the original ones (Morales et al., 2012). P value – statistical significance for each model; Coefficient – an indication of the strength of the effect of each independent variable to the model and its associated standard error; t-statistic and Pr(>|t|) – indications of the statistical significance that an independent variable is contributing to the explanatory power of the model.

Supplementary Table 2. **Linear regression models of correlation between the level of somatic instability (SI) of *DMPK* expansions, the 10<sup>th</sup> percentile allele length (10<sup>th</sup>p) and age at sampling (AS) in DM1 patients including the reference group of 136 patients with pure *DMPK* expansions (Morales et al., 2012) and our patients analyzed at both time points (six/seven with interrupted and four with pure *DMPK* expansions). The size of the 5' ends was considered for the patients with interrupted *DMPK* expansions.**

| Model                                                                                                                                                                                                                      | Term                                              | Coefficient         | Standard error | t-statistics | Pr(> t )    | R <sup>2</sup><br>(adjusted) | P value                            |
|----------------------------------------------------------------------------------------------------------------------------------------------------------------------------------------------------------------------------|---------------------------------------------------|---------------------|----------------|--------------|-------------|------------------------------|------------------------------------|
| <b>The first time point</b>                                                                                                                                                                                                |                                                   |                     |                |              |             |                              |                                    |
| Model 8**:<br>$\log(SI) = \beta_0 + \beta_1 \log_{10}(10^{\text{th}}p) + \beta_2 \log_{10}(AS) + \beta_3 \log_{10}(10^{\text{th}}p) \times \log_{10}(AS) + \beta_4 \log_{10}(10^{\text{th}}p)^2 + \beta_5 \log_{10}(AS)^2$ | Intercept                                         | $\beta_0 = -9.3401$ | 0.9048         | -10.323      | $<2e^{-16}$ | 0.90                         | <b><math>&lt;2.2e^{-16}</math></b> |
|                                                                                                                                                                                                                            | $\log_{10}(10^{\text{th}}p)$                      | $\beta_1 = 8.8148$  | 0.6308         | 13.974       | $<2e^{-16}$ |                              |                                    |
|                                                                                                                                                                                                                            | $\log_{10}(AS)$                                   | $\beta_2 = -1.4058$ | 0.5733         | -2.452       | 0.02        |                              |                                    |
|                                                                                                                                                                                                                            | $\log_{10}(10^{\text{th}}p) \times \log_{10}(AS)$ | $\beta_3 = 0.4063$  | 0.1370         | 2.966        | 0.004       |                              |                                    |
|                                                                                                                                                                                                                            | $\log_{10}(10^{\text{th}}p)^2$                    | $\beta_4 = -1.6636$ | 0.1216         | -13.683      | $<2e^{-16}$ |                              |                                    |
|                                                                                                                                                                                                                            | $\log_{10}(AS)^2$                                 | $\beta_5 = 0.3684$  | 0.1320         | 2.790        | 0.006       |                              |                                    |
| <b>The second time point</b>                                                                                                                                                                                               |                                                   |                     |                |              |             |                              |                                    |
| Model 8**:<br>$\log(SI) = \beta_0 + \beta_1 \log_{10}(10^{\text{th}}p) + \beta_2 \log_{10}(AS) + \beta_3 \log_{10}(10^{\text{th}}p) \times \log_{10}(AS) + \beta_4 \log_{10}(10^{\text{th}}p)^2 + \beta_5 \log_{10}(AS)^2$ | Intercept                                         | $\beta_0 = -9.3412$ | 0.8887         | -10.511      | $<2e^{-16}$ | 0.90                         | <b><math>&lt;2.2e^{-16}</math></b> |
|                                                                                                                                                                                                                            | $\log_{10}(10^{\text{th}}p)$                      | $\beta_1 = 8.8493$  | 0.6180         | 14.319       | $<2e^{-16}$ |                              |                                    |
|                                                                                                                                                                                                                            | $\log_{10}(AS)$                                   | $\beta_2 = -1.4704$ | 0.5607         | -2.622       | 0.009       |                              |                                    |
|                                                                                                                                                                                                                            | $\log_{10}(10^{\text{th}}p) \times \log_{10}(AS)$ | $\beta_3 = 0.4197$  | 0.1345         | 3.120        | 0.002       |                              |                                    |
|                                                                                                                                                                                                                            | $\log_{10}(10^{\text{th}}p)^2$                    | $\beta_4 = -1.6737$ | 0.1190         | -14.068      | $<2e^{-16}$ |                              |                                    |
|                                                                                                                                                                                                                            | $\log_{10}(AS)^2$                                 | $\beta_5 = 0.3789$  | 0.1283         | 2.953        | 0.003       |                              |                                    |

The published linear regression model 8 explaining the variability of somatic instability (Morales et al., 2012) was retested using the 10<sup>th</sup> percentile allele length (as an estimation of the progenitor allele length (Higham, 2013)) and age at sampling as independent variables. The size of the 5' ends of interrupted *DMPK* expansions were obtained by subtracting the corresponding interrupted parts at the 3' end from all detected expanded alleles. P value – statistical significance for each model; Coefficient – an indication of the strength of the effect of each independent variable to the model and its associated standard error; t-statistic and Pr(>|t|) – indications of the statistical significance that an independent variable is contributing to the explanatory power of the model.

Supplementary Table 3. **Linear regression models of correlation between the age at onset (AO), the 10<sup>th</sup> percentile allele length (10<sup>th</sup>p) and standardized residuals of somatic instability (SI) in DM1 patients including the reference sample of 121 symptomatic patients with uninterrupted *DMPK* expansions (Morales et al., 2012) and our patients observed at the first time point (six with interrupted and four with pure *DMPK* expansions) and at the second time point (seven with interrupted and four with pure *DMPK* expansions).**

| Model                                                                                                                                                              | Term                                   | Coefficient          | Standard error | t-statistics | Pr(> t )      | R <sup>2</sup><br>(adjusted) | P value                            |
|--------------------------------------------------------------------------------------------------------------------------------------------------------------------|----------------------------------------|----------------------|----------------|--------------|---------------|------------------------------|------------------------------------|
| <b>The first time point</b>                                                                                                                                        |                                        |                      |                |              |               |                              |                                    |
| Model 9*: AO = $\beta_0 + \beta_1 \log_{10}(10^{\text{th}} \text{p})$                                                                                              | Intercept                              | $\beta_0 = 105.354$  | 8.552          | 12.320       | $<2e^{-16}$   | 0.43                         | <b><math>&lt;2.2e^{-16}</math></b> |
|                                                                                                                                                                    | $\log_{10}(10^{\text{th}} \text{p})$   | $\beta_1 = -32.939$  | 3.321          | -9.918       | $<2e^{-16}$   |                              |                                    |
| Model 10*: AO = $\beta_0 + \beta_1 \log_{10}(10^{\text{th}} \text{p}) + \beta_2 \log_{10}(10^{\text{th}} \text{p})^2$                                              | Intercept                              | $\beta_0 = 304.963$  | 50.612         | 6.026        | $1.67e^{-08}$ | 0.49                         | <b><math>&lt;2.2e^{-16}</math></b> |
|                                                                                                                                                                    | $\log_{10}(10^{\text{th}} \text{p})$   | $\beta_1 = -197.944$ | 41.419         | -4.779       | $4.75e^{-06}$ |                              |                                    |
|                                                                                                                                                                    | $\log_{10}(10^{\text{th}} \text{p})^2$ | $\beta_2 = 33.605$   | 8.411          | 3.995        | $1.08e^{-04}$ |                              |                                    |
| Model 11*: AO = $\beta_0 + \beta_1 \log_{10}(10^{\text{th}} \text{p}) + \beta_2 \text{standardized residual of SI} + \beta_3 \log_{10}(10^{\text{th}} \text{p})^2$ | Intercept                              | $\beta_0 = 304.294$  | 47.696         | 6.380        | $3.02e^{-09}$ | 0.55                         | <b><math>&lt;2.2e^{-16}</math></b> |
|                                                                                                                                                                    | $\log_{10}(10^{\text{th}} \text{p})$   | $\beta_1 = -197.576$ | 39.032         | -5.062       | $1.42e^{-06}$ |                              |                                    |
|                                                                                                                                                                    | standardized residual(SI)              | $\beta_2 = 33.565$   | 0.813          | -4.139       | $6.31e^{-05}$ |                              |                                    |
|                                                                                                                                                                    | $\log_{10}(10^{\text{th}} \text{p})^2$ | $\beta_3 = -3.365$   | 7.926          | 4.235        | $4.36e^{-05}$ |                              |                                    |
| <b>The second time point</b>                                                                                                                                       |                                        |                      |                |              |               |                              |                                    |
| Model 9*: AO = $\beta_0 + \beta_1 \log_{10}(10^{\text{th}} \text{p})$                                                                                              | Intercept                              | $\beta_0 = 106.435$  | 8.528          | 12.48        | $<2e^{-16}$   | 0.43                         | <b><math>&lt;2.2e^{-16}</math></b> |
|                                                                                                                                                                    | $\log_{10}(10^{\text{th}} \text{p})$   | $\beta_1 = -33.304$  | 3.310          | -10.06       | $<2e^{-16}$   |                              |                                    |
| Model 10*: AO = $\beta_0 + \beta_1 \log_{10}(10^{\text{th}} \text{p}) + \beta_2 \log_{10}(10^{\text{th}} \text{p})^2$                                              | Intercept                              | $\beta_0 = 304.107$  | 50.777         | 5.989        | $1.96e^{-08}$ | 0.49                         | <b><math>&lt;2.2e^{-16}</math></b> |
|                                                                                                                                                                    | $\log_{10}(10^{\text{th}} \text{p})$   | $\beta_1 = -196.532$ | 41.512         | -4.734       | $5.70e^{-06}$ |                              |                                    |
|                                                                                                                                                                    | $\log_{10}(10^{\text{th}} \text{p})^2$ | $\beta_2 = 33.214$   | 8.423          | 3.943        | $1.31e^{-04}$ |                              |                                    |
| Model 11*: AO = $\beta_0 + \beta_1 \log_{10}(10^{\text{th}} \text{p}) + \beta_2 \text{standardized residual of SI} + \beta_3 \log_{10}(10^{\text{th}} \text{p})^2$ | Intercept                              | $\beta_0 = 303.1017$ | 47.8211        | 6.338        | $3.64e^{-09}$ | 0.55                         | <b><math>&lt;2.2e^{-16}</math></b> |
|                                                                                                                                                                    | $\log_{10}(10^{\text{th}} \text{p})$   | $\beta_1 = -195.853$ | 39.0958        | -5.010       | $1.77e^{-06}$ |                              |                                    |
|                                                                                                                                                                    | standardized residual(SI)              | $\beta_2 = -3.3680$  | 0.8064         | -4.177       | $5.44e^{-05}$ |                              |                                    |
|                                                                                                                                                                    | $\log_{10}(10^{\text{th}} \text{p})^2$ | $\beta_3 = 33.1042$  | 7.9325         | 4.173        | $5.51e^{-05}$ |                              |                                    |

The published linear regression models explaining the variability in age at onset (Morales et al., 2012) were retested using the 10<sup>th</sup> percentile allele length and standardized residuals of somatic instability according to model 8\* (not accounted for by the 10<sup>th</sup>

percentile allele length and age at sampling) as independent variables. P value – statistical significance for each model; Coefficient – an indication of the strength of the effect of each independent variable to the model and its associated standard error; t-statistic and  $\Pr(>|t|)$  – indications of the statistical significance that the independent variable is contributing to the explanatory power of the model.

**Supplementary Table 4. Dataset of expanded *DMPK* alleles sized in blood cells at the first (t1) and the second (t2) time point and in buccal cells (B) at the second time point in seven patients with interruptions and four patients without interruptions.**

(This table has been submitted as a separate .xlsx file named Table 4.)

At least 200 individual alleles were sized per sample. The age at sampling (AS) and the age at onset (AO) are indicated for each patient. A value of 0.5 has been added to all AS and AO to allow log transformation of the data. \* – analyzed patients with uninterrupted *DMPK* expansions

Supplementary Table 5. **The observed and expected level of somatic instability of interrupted and uninterrupted *DMPK* expansions in blood samples at two time points and the observed level of somatic instability in buccal swab samples.**

| Patient ID | Blood t1 |     |                  |                  |     |     | Blood t2 |     |                  |                  |     |     | Buccal swab t2 |     |                  |                  |     |
|------------|----------|-----|------------------|------------------|-----|-----|----------|-----|------------------|------------------|-----|-----|----------------|-----|------------------|------------------|-----|
|            | AS       | M   | 10 <sup>th</sup> | 90 <sup>th</sup> | SI  | E*  | AS       | M   | 10 <sup>th</sup> | 90 <sup>th</sup> | SI  | E*  | AS             | M   | 10 <sup>th</sup> | 90 <sup>th</sup> | SI  |
| DF1-1      | 61.5     | 670 | 459              | 920              | 461 | 842 | 65.5     | 701 | 443              | 979              | 536 | 873 | 65.5           | 732 | 581              | 975              | 394 |
| DF1-2      | 34.5     | 454 | 348              | 608              | 260 | 407 | 38.5     | 527 | 384              | 670              | 286 | 483 | 38.5           | 543 | 433              | 678              | 245 |
| DF1-3      | 35.5     | 684 | 441              | 840              | 399 | 505 | 39.5     | 745 | 469              | 941              | 472 | 571 | 39.5           | 786 | 609              | 950              | 341 |
| DF2-1      | 45.5     | 492 | 371              | 697              | 326 | 539 | 48       | 472 | 350              | 688              | 338 | 530 | 48             | NA  | NA               | NA               | NA  |
| DF3-1      | 50       | 384 | 266.5            | 562.5            | 296 | 394 | 52.5     | 394 | 289              | 560              | 271 | 455 | 52.5           | NA  | NA               | NA               | NA  |
| DF3-2      | NA       | NA  | NA               | NA               | NA  | NA  | 31.5     | 222 | 187              | 285              | 98  | 157 | 31.5           | NA  | NA               | NA               | NA  |
| DF5-2      | 26.5     | 283 | 235              | 337              | 102 | 209 | 30.5     | 330 | 262              | 420              | 158 | 265 | 30.5           | 326 | 269              | 401              | 132 |
| DF5-3*     | 23.5     | 454 | 314              | 587              | 273 | 282 | 27.5     | 568 | 422              | 758              | 336 | 403 | 27.5           | 560 | 420              | 701              | 281 |
| MD70*      | 50.5     | 168 | 106              | 259              | 153 | 58  | 61.5     | 219 | 146              | 421              | 275 | 148 | 61.5           | NA  | NA               | NA               | NA  |
| MD179*     | 14.5     | 427 | 326              | 522              | 196 | 226 | 23       | 546 | 415              | 688              | 273 | 353 | 23             | NA  | NA               | NA               | NA  |
| MD180*     | 22.5     | 611 | 400              | 785              | 385 | 341 | 30.5     | 785 | 462              | 1062             | 600 | 460 | 30.5           | NA  | NA               | NA               | NA  |

t1 and t2 – the first and the second time point, respectively; AS – age at sampling in years; M, 10<sup>th</sup> and 90<sup>th</sup> – median, the 10<sup>th</sup> percentile and the 90<sup>th</sup> percentile allele length inferred from more than 200 alleles sized in each sample; SI – observed level of somatic instability assumed as the difference in the number of repeats at the 10<sup>th</sup> and at the 90<sup>th</sup> percentile allele length; E\* – the expected level of somatic instability according to the linear regression model 8\* (Supp. Table 1) which shows a correlation of the level of somatic instability, the 10<sup>th</sup> percentile allele length and age at sampling; \* – analyzed patients with uninterrupted *DMPK* expansions; NA – not available.



Supplementary Table 6. **The observed and expected level of somatic instability of the 5' ends of interrupted *DMPK* expansions at two time points.**

| Patient ID | Blood t1 |     |                  |                  |     |     | Blood t2 |     |                  |                  |     |     |
|------------|----------|-----|------------------|------------------|-----|-----|----------|-----|------------------|------------------|-----|-----|
|            | AS       | M   | 10 <sup>th</sup> | 90 <sup>th</sup> | SI  | E*  | AS       | M   | 10 <sup>th</sup> | 90 <sup>th</sup> | SI  | E*  |
| DF1-1      | 61.5     | 635 | 424              | 885              | 461 | 812 | 65.5     | 666 | 408              | 944              | 536 | 838 |
| DF1-2      | 34.5     | 419 | 313              | 573              | 260 | 368 | 38.5     | 492 | 349              | 635              | 286 | 449 |
| DF1-3      | 35.5     | 649 | 406              | 805              | 399 | 482 | 39.5     | 710 | 434              | 906              | 472 | 551 |
| DF2-1      | 45.5     | 407 | 286              | 612              | 326 | 408 | 48       | 387 | 265              | 603              | 338 | 383 |
| DF3-1      | 50       | 345 | 227.5            | 523.5            | 296 | 314 | 52.5     | 355 | 250              | 521              | 271 | 378 |
| DF3-2      | NA       | NA  | NA               | NA               | NA  | NA  | 31.5     | NA  | 148              | 246              | 98  | 98  |
| DF5-2      | 26.5     | 254 | 206              | 308              | 102 | 171 | 30.5     | 302 | 233              | 391              | 158 | 227 |

The size of the 5' ends were obtained by subtracting the corresponding interrupted parts at the 3' end from all detected expanded alleles in a sample. t1 and t2 – the first and the second time point, respectively; AS – age at sampling in years; M, 10<sup>th</sup> and 90<sup>th</sup> – median, the 10<sup>th</sup> percentile and the 90<sup>th</sup> percentile allele length inferred from more than 200 sized alleles in each sample; SI – observed level of somatic instability assumed as the difference in the number of repeats at the 10<sup>th</sup> and at the 90<sup>th</sup> percentile allele length; E\* – the expected level of somatic instability according to the linear regression model 8\*\* (Supp. Table 2) which shows a correlation of the level of somatic instability, the 10<sup>th</sup> percentile allele length and age at sampling; NA – not available.

Supplementary Table 7. Comparisons of observed and expected age at onset in patients with interrupted and uninterrupted *DMPK* expansions according to the analyses at two time points.

| Patient ID | AO   | Expected AO |                |        |                |          |                |        |               |
|------------|------|-------------|----------------|--------|----------------|----------|----------------|--------|---------------|
|            |      | Blood t1    |                |        |                | Blood t2 |                |        |               |
|            |      | E(10*)      | WSRT           | E(11*) | WSRT           | E(10*)   | WSRT           | E(11*) | WSRT          |
| DF1-1      | 39.5 | 16.2        | V=18<br>P=0.16 | 21.9   | V=17<br>P=0.22 | 16.6     | V=25<br>P=0.08 | 21.3   | V=22<br>P=0.2 |
| DF1-2      | 30.5 | 18.9        |                | 23.5   |                | 18.0     |                | 23.3   |               |
| DF1-3      | 15.5 | 16.5        |                | 18.9   |                | 16.1     |                | 18.0   |               |
| DF2-1      | 40.5 | 18.2        |                | 23.2   |                | 19.1     |                | 23.7   |               |
| DF3-1      | 45.5 | 22.5        |                | 25.8   |                | 21.6     |                | 27.1   |               |
| DF3-2      | 31.5 | NA          |                | NA     |                | 29.0     |                | 34.0   |               |
| DF5-2      | 22.5 | 24.6        |                | 31.7   |                | 23.1     |                | 28.4   |               |
| DF5-3*     | 21.5 | 20.2        | V=1<br>P=0.25  | 20.6   | V=3<br>P=0.63  | 17.1     | V=5<br>P=1     | 19.0   | V=6<br>P=0.88 |
| MD70*      | 35.5 | 41.9        |                | 34.0   |                | 34.3     |                | 29.5   |               |
| MD179*     | 13.5 | 19.7        |                | 20.9   |                | 17.2     |                | 19.8   |               |
| MD180*     | 14.5 | 17.4        |                | 16.3   |                | 16.2     |                | 13.8   |               |

AO – observed age at onset in years as self-reported by patients; t1 and t2 – the first and the second time point, respectively; E(10\*) – the expected age at onset according to the linear regression model 10\* showing correlation between age at onset and the 10<sup>th</sup> percentile allele length (Supp. Table 3); E(11\*) – the expected age at onset according to the linear regression model 11\* showing correlation between age at onset, the 10<sup>th</sup> percentile of allele length and residual variation in somatic instability according to model 8\* (not accounted for by the 10<sup>th</sup> percentile allele length and age at sampling) (Supp. Table 3); WSRT- Wilcoxon signed-rank test; V – statistics of the Wilcoxon signed-rank test used for comparison of the observed and expected age at onset in each group of patients. \* – analyzed patients with uninterrupted *DMPK* expansions.

## References

- Higham, C.F. (2013). Dynamic DNA and human disease: mathematical modelling and statistical inference for myotonic dystrophy type 1 and Huntington disease. [dissertation thesis]. [Glasgow, UK]: University of Glasgow.
- Morales, F., Couto, J.M., Higham, C.F., Hogg, G., Cuenca, P., Braida, C., et al. (2012). Somatic instability of the expanded CTG triplet repeat in myotonic dystrophy type 1 is a heritable quantitative trait and modifier of disease severity. *Human Molecular Genetics*, 21(16), 3558-3567. doi:10.1093/hmg/dds185
